# Supplementary material for: Synthesis and characterization of glucosulfonic acid supported on Fe3O4 nanoparticles as a novel and magnetically recoverable nanocatalyst and its application in the synthesis of polyhydroquinoline and 2,3-dihydroquinazolin-4(1H)-one derivatives
Source: Royal Society of Chemistry journal article supplement (doi:10.1039/c5ra08952b), 2015-01-01
Supplement: c5ra08952b1.pdf [file c5ra08952b1.pdf]

## Supporting Information

### **Synthesis and characterization of Glucosulfonic acid supported on Fe<sub>3</sub>O<sub>4</sub> nanoparticles as novel and magnetically recoverable nanocatalyst and its application in the synthesis of polyhydroquinoline and 2,3-dihydroquinazolin-4(1H)-one derivatives**

Maryam Hajjami\* and Bahman Tahmasbi

Department of Chemistry, Faculty of Science, Ilam University, Ilam, Iran

E-mail address: [mhajjami@yahoo.com](mailto:mhajjami@yahoo.com) or [m.hajjami@mail.ilam.ac.ir](mailto:m.hajjami@mail.ilam.ac.ir)

### **General procedure for the synthesis of polyhydroquinoline derivatives**

\* Address correspondence to M. Hajjami, Department of Chemistry, Faculty of Science, Ilam University, P.O. Box 69315516, Ilam, Iran; Tel/Fax: +98 841 2227022; E-mail address: [mhajjami@yahoo.com](mailto:mhajjami@yahoo.com) or [m.hajjami@mail.ilam.ac.ir](mailto:m.hajjami@mail.ilam.ac.ir)

A mixture of aldehyde (1 mmol), dimedon (1 mmol), ethylacetoacetate (1 mmol), ammonium acetate (1.2 mmol) and GSA@MNPs (0.05 g) was stirred in ethanol under reflux conditions and the progress of the reaction was monitored by TLC. After completion of the reaction, catalyst was separated by an external magnet and washed with ethylacetate. Then, the solvent was evaporated and all products were recrystallized in ethanol, which the pure polyhydroquinoline derivatives were obtained in good to excellent yields.

### Compounds Characterization Data

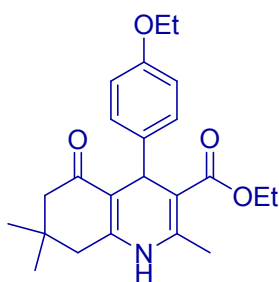

#### **Ethyl-4-(4-ethoxyphenyl)-2,7,7-trimethyl-5-oxo-1,4,5,6,7,8-hexahydroquinoline-3-carboxylate (entry 2, table 2):**

Mp: 176-179 °C. IR (KBr)  $\text{cm}^{-1}$ : 3446, 3276, 3198, 1684, 1607, 1494.  $^1\text{H}$  NMR (400 MHz,  $\text{DMSO-}d_6$ ):  $\delta_{\text{H}}$  = 7.28-7.19 (m, 2H), 6.74-6.72 (d,  $J=8$ , 2H), 5.80 (s, 1H), 4.99 (s, 1H), 4.07-4.05 (t,  $J=4$ , 2H), 3.97-3.96 (t,  $J=3.6$ , 2H), 2.39-2.15 (m, 7H), 1.38-1.37 (m, 3H), 1.21-1.20 (m, 3H), 1.07 (s, 3H), 0.95 (s, 3H) ppm.

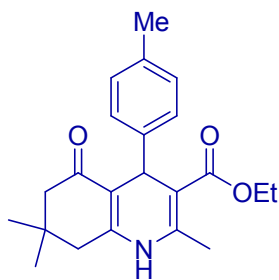

#### **Ethyl-4-(4-methylphenyl)-2,7,7-trimethyl-5-oxo-1,4,5,6,7,8-hexahydroquinoline-3-carboxylate (entry 3, table 2):**

Mp: 252-254 °C. IR (KBr)  $\text{cm}^{-1}$ : 3276, 3246, 3208, 1702, 1648, 1423.  $^1\text{H}$  NMR (400 MHz,  $\text{DMSO-}d_6$ ):  $\delta_{\text{H}}$ = 9.04 (s, 1H), 7.05-7.03 (d,  $J=8$ , 2H), 7.00-6.98 (d,  $J=8$ , 2H), 4.82 (s, 1H), 4.00-3.95 (q,  $J=7.2$ , 2H), 2.45-2.41 (d,  $J=16$ , 1H), 2.31-2.27 (m, 4H), 2.21-2.15 (m, 4H), 2.10-1.96 (d,  $J=16$ , 1H), 1.17-1.13 (t,  $J=6.8$ , 3H), 1.02 (s, 3H), 0.86 (s, 3H) ppm.

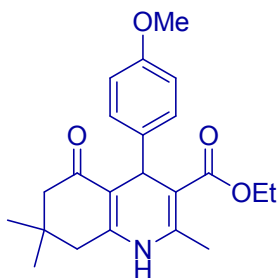

**Ethyl-4-(4-methoxyphenyl)-2,7,7-trimethyl-5-oxo-1,4,5,6,7,8-hexahydroquinoline-3-carboxylate (entry 5, table 2):**

Mp: 249-250 °C. IR (KBr)  $\text{cm}^{-1}$ : 3278, 3246, 3208, 1701, 1649, 1423.  $^1\text{H}$  NMR (400 MHz,  $\text{DMSO-}d_6$ ):  $\delta_{\text{H}}$ = 9.04 (s, 1H), 7.08-7.06 (d,  $J=8.4$ , 2H), 6.77-6.75 (d,  $J=8.4$ , 2H), 4.80 (s, 1H), 4.02-3.96 (q,  $J=7.2$ , 2H), 3.69 (s, 3H), 2.52-2.45 (d,  $J=29.2$ , 1H), 2.31-2.29 (m, 4H), 2.20-2.16 (d,  $J=16$ , 1H), 2.01-1.97 (d,  $J=16.4$ , 1H), 1.17-1.14 (t,  $J=7.2$ , 3H), 1.02 (s, 3H), 0.87 (s, 3H) ppm.

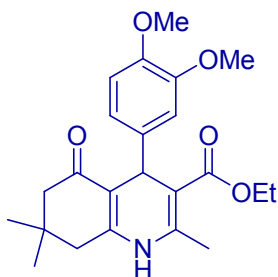

**Ethyl-4-(3,4-dimethoxyphenyl)-2,7,7-trimethyl-5-oxo-1,4,5,6,7,8-hexahydroquinoline-3-carboxylate (entry 6, table 2):**

Mp: 204-205 °C. IR (KBr)  $\text{cm}^{-1}$ : 3280, 3213, 1696, 1645, 1452.  $^1\text{H}$  NMR (400 MHz,  $\text{DMSO-}d_6$ ):  $\delta_{\text{H}}$ = 9.05 (s, 1H), 6.79-6.76 (m, 2H), 6.65-6.63 (d,  $J=8$ , 1H), 4.80 (s, 1H), 4.04-3.99 (q,  $J=7.2$ ,

2H), 3.69-3.68 (d,  $J=4.4$ , 5H), 2.47-2.42 (d,  $J=17.2$ , 2H), 2.35-2.27 (m, 4H), 2.22-2.18 (d,  $J=16$ , 1H), 2.03-1.99 (d,  $J=16$ , 1H), 1.20-1.16 (t,  $J=6.8$ , 3H), 1.03 (s, 3H), 0.90 (s, 3H) ppm.

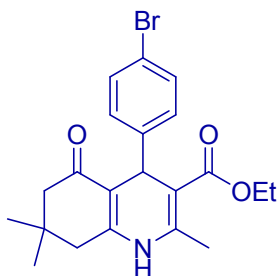

**Ethyl-4-(4-bromophenyl)-2,7,7-trimethyl-5-oxo-1,4,5,6,7,8-hexahydroquinoline-3-carboxylate (entry 8, table 2):**

Mp: 251-252 °C. IR (KBr)  $\text{cm}^{-1}$ : 3276, 3243, 3207, 1703, 1649, 1421.  $^1\text{H}$  NMR (400 MHz,  $\text{DMSO-}d_6$ ):  $\delta_{\text{H}}=$  9.14 (s, 1H), 7.41-7.39 (d,  $J=8.4$ , 2H), 7.13-7.11 (d,  $J=8$ , 2H), 4.84 (s, 1H), 4.01-3.96 (q,  $J=6.8$ , 2H), 2.52-2.46 (d,  $J=26.4$ , 1H), 2.31-2.27 (m, 4H), 2.21-2.17 (d,  $J=16$ , 1H), 2.01-1.97 (d,  $J=16$ , 1H), 1.15-1.12 (t,  $J=7.2$ , 3H), 1.02 (s, 3H), 0.85 (s, 3H) ppm.

**General procedure for the synthesis of 2,3-dihydroquinazolin-4(1H)-ones derivatives**

A mixture of GSA@MNPs (0.01 g), anthranilamide (1 mmol) and aldehyde (1 mmol) was stirred at 80 °C in ethanol (2 mL). The progress was monitored by TLC. After completion of the reaction, the reaction mixture was cooled to room temperature.  $\text{CH}_2\text{Cl}_2$  (2  $\times$  5 mL) was added and the catalyst was separated using an external magnet.  $\text{CH}_2\text{Cl}_2$  was evaporated under reduced pressure to afford the essentially pure products and all products was recrystallized in ethanol for further purification.

**Compound Characterization Data**

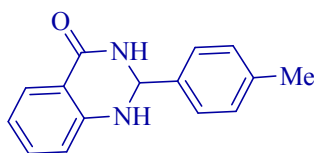

**2-(4-methylphenyl)-2,3-dihydroquinazolin-4(1H)-one (entry 4, table 4):**

Mp: 228-230 °C. IR (KBr)  $\text{cm}^{-1}$ : 3313, 1658, 1611, 1439.  $^1\text{H}$  NMR (400 MHz,  $\text{DMSO-}d_6$ ):  $\delta_{\text{H}}$  = 8.21 (s, 1H), 7.62-7.59 (d,  $J=7.5$ , 1H), 7.38-7.35 (d,  $J=7.5$ , 2H), 7.26-7.14 (m, 3H), 7.03 (s, 1H), 6.75-6.64 (m, 2H), 5.71 (s, 1H), 2.49-2.42 (s, 3H) ppm.

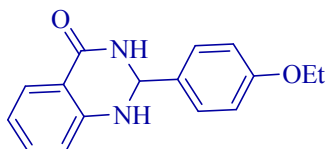

**2-(4-ethoxyphenyl)-2,3-dihydroquinazolin-4(1H)-one (entry 5, table 4):**

Mp: 167-169 °C. IR (KBr)  $\text{cm}^{-1}$ : 3301, 1650, 1613, 1443.  $^1\text{H}$  NMR (400 MHz,  $\text{DMSO-}d_6$ ):  $\delta_{\text{H}}$  = 7.95-7.94 (b, 1H), 7.52-7.50 (m, 2H), 7.34 (s, 1H), 7.26 (s, 1H), 6.95-6.90 (m, 3H), 6.68-6.67 (m, 1H), 5.85 (s, 1H), 5.75 (s, 1H), 4.07-4.05 (q,  $J=4$ , 2H), 1.46-1.44 (s, 3H) ppm.

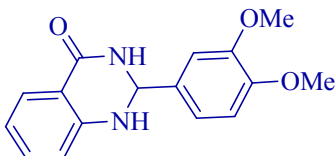

**2-(3,4-dimethoxyphenyl)-2,3-dihydroquinazolin-4(1H)-one (entry 6, table 4):**

Mp: 211-213 °C. IR (KBr)  $\text{cm}^{-1}$ : 3335, 1671, 1610, 1436.  $^1\text{H}$  NMR (400 MHz,  $\text{DMSO-}d_6$ ):  $\delta_{\text{H}}$  = 8.21 (s, 1H), 7.64-7.62 (d,  $J=7.6$ , 1H), 7.28-7.24 (t,  $J=0.8$ , 1H), 7.15 (d,  $J=1.6$ , 1H), 7.04-6.97 (m, 2H), 6.95 (s, 1H), 6.78-6.76 (d,  $J=8$ , 1H), 6.72-6.67 (t,  $J=1.2$ , 1H), 5.71 (s, 1H), 3.77 (s, 3H), 3.76 (s, 3H) ppm.

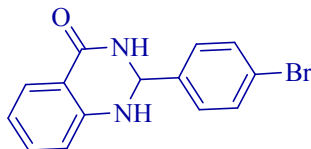

**2-(4-bromophenyl)-2,3-dihydroquinazolin-4(1H)-one (entry 8, table 4):**

Mp: 197-199 °C. IR (KBr)  $\text{cm}^{-1}$ : 3310, 1656, 1608, 1433.  $^1\text{H}$  NMR (400 MHz,  $\text{DMSO-}d_6$ ):  $\delta_{\text{H}}=$  8.17-8.14 (m, 1H), 7.80-7.78 (m, 1H), 7.63-7.59 (m, 3H), 7.47-7.44 (m, 2H), 7.30-7.24 (m, 1H), 6.77-6.72 (d,  $J=19.2$ , 1H), 6.71-6.68 (m, 1H), 5.76 (s, 1H) ppm.

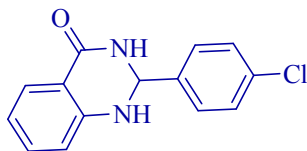

**2-(4-chlorophenyl)-2,3-dihydroquinazolin-4(1H)-one (entry 9, table 4):**

Mp: 202-204 °C. IR (KBr)  $\text{cm}^{-1}$ : 3309, 1655, 1611, 1435.  $^1\text{H}$  NMR (400 MHz,  $\text{DMSO-}d_6$ ):  $\delta_{\text{H}}=$  8.29 (s, 1H), 7.61-7.43 (m, 5H), 7.26-7.20 (t,  $J=7.5$ , 1H), 7.12 (s, 1H), 6.75-6.63 (m, 2H), 5.75 (s, 1H) ppm.

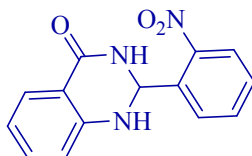

**2-(2-nitrophenyl)-2,3-dihydroquinazolin-4(1H)-one (entry 10, table 4):**

Mp: 190-192 °C. IR (KBr)  $\text{cm}^{-1}$ : 3372, 1667, 1613, 1517, 1453, 1342.  $^1\text{H}$  NMR (400 MHz,  $\text{DMSO-}d_6$ ):  $\delta_{\text{H}}=$  8.26 (s, 1H), 8.10-8.08 (d,  $J=8$ , 1H), 7.89-7.87 (d,  $J=8$ , 1H), 7.83-7.80 (t,  $J=0.8$ , 1H), 7.70-7.63 (m, 2H), 7.30-7.26 (m, 1H), 7.04 (s, 1H), 6.81 (d,  $J=1.2$ , 1H), 6.77-6.72 (m, 1H), 6.36 (m, 1H) ppm.

**IR and  $^1\text{H}$ NMR Spectra**

**IR of Ethyl-4-(4-ethoxyphenyl)-2,7,7-trimethyl-5-oxo-1,4,5,6,7,8-hexahydroquinoline-3-carboxylate (entry 2, table 2)**

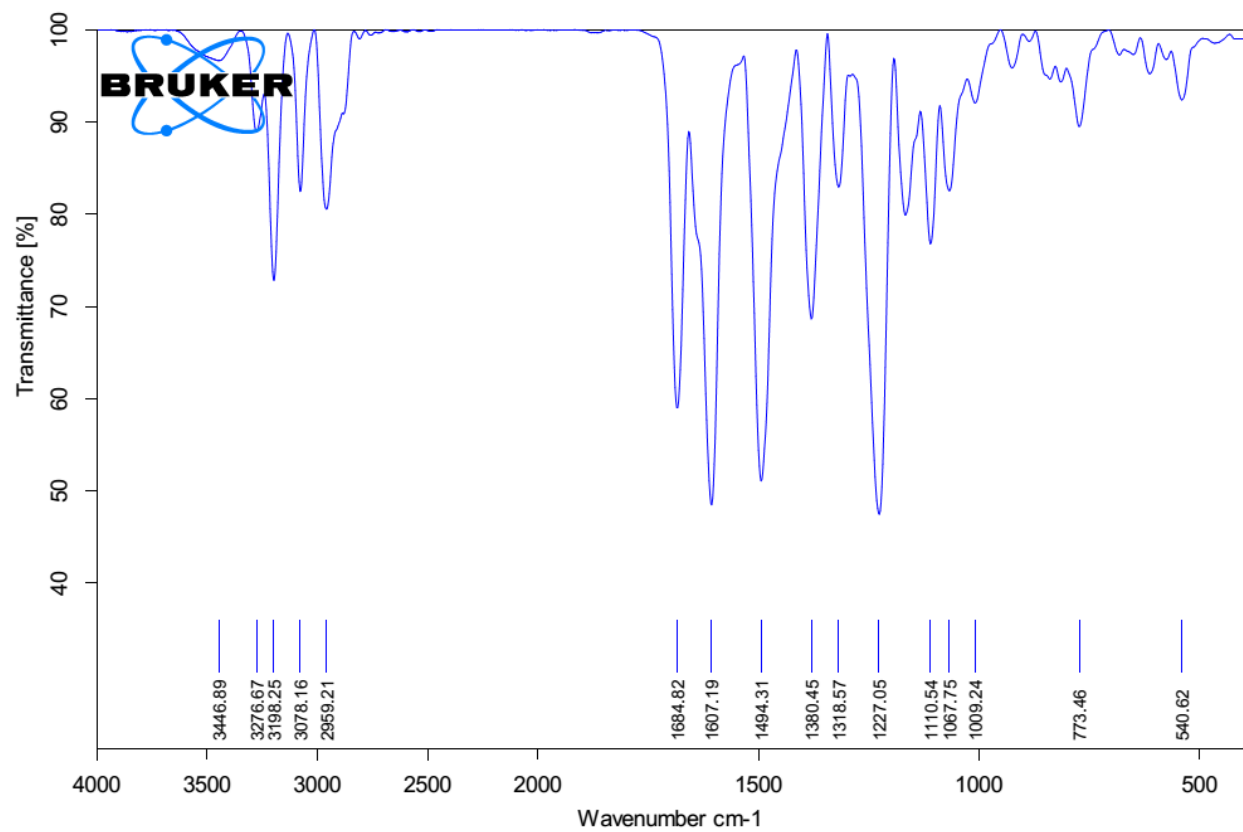

**<sup>1</sup>H NMR of Ethyl-4-(4-ethoxyphenyl)-2,7,7-trimethyl-5-oxo-1,4,5,6,7,8-hexahydroquinoline-3-carboxylate (entry 2, table 2)**

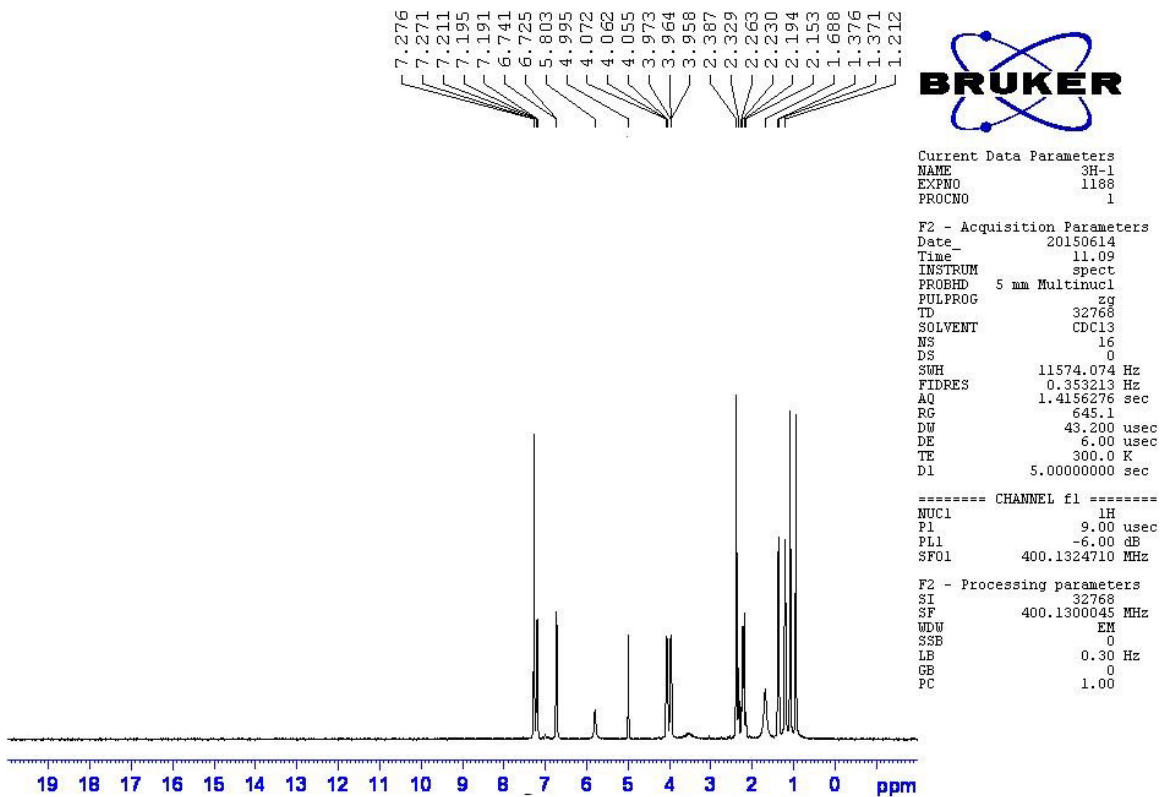

**IR of Ethyl-4-(4-methylphenyl)-2,7,7-trimethyl-5-oxo-1,4,5,6,7,8-hexahydroquinoline-3-carboxylate (entry 3, table 2)**



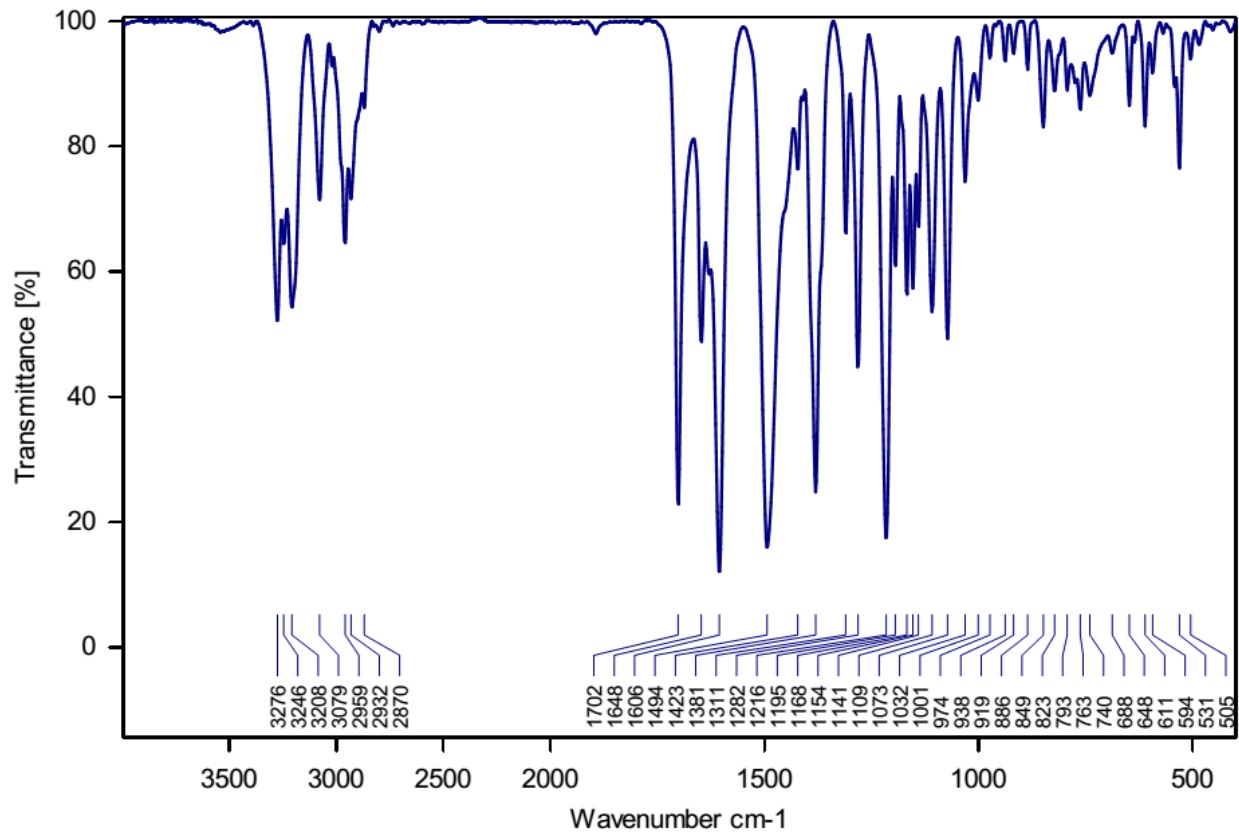

**<sup>1</sup>HNMR of Ethyl-4-(4-methylphenyl)-2,7,7-trimethyl-5-oxo-1,4,5,6,7,8-hexahydroquinoline-3-carboxylate (entry 3, table 2)**

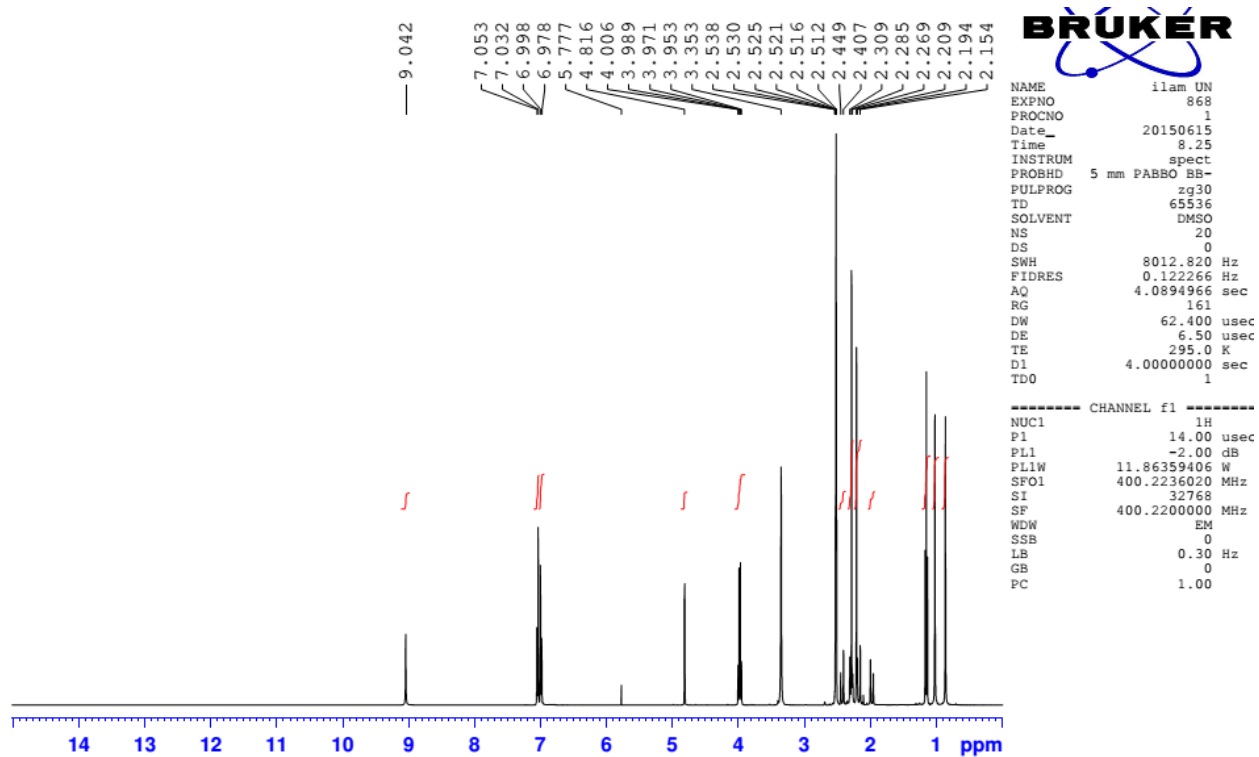

IR of Ethyl-4-(4-methoxyphenyl)-2,7,7-trimethyl-5-oxo-1,4,5,6,7,8-hexahydroquinoline-3-carboxylate (entry 5, table 2)

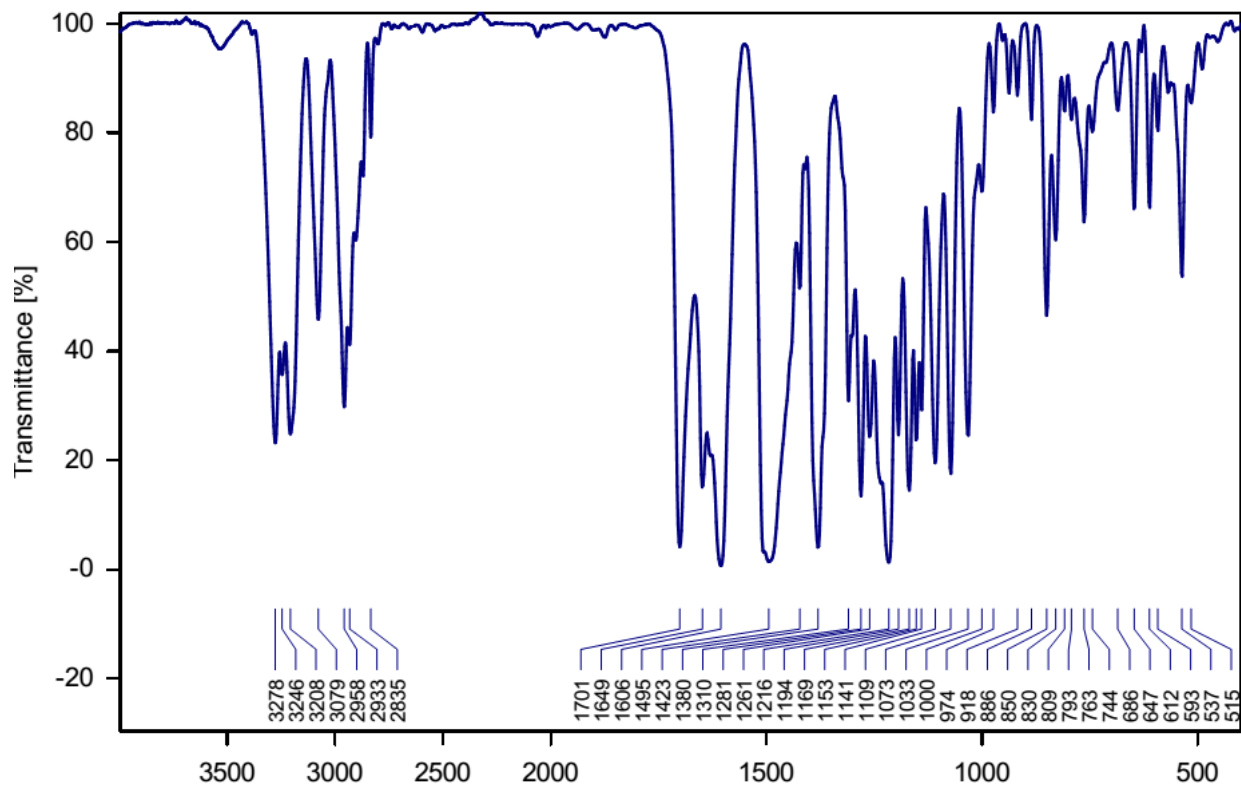

**<sup>1</sup>HNMR of Ethyl-4-(4-methoxyphenyl)-2,7,7-trimethyl-5-oxo-1,4,5,6,7,8-hexahydroquinoline-3-carboxylate (entry 5, table 2)**

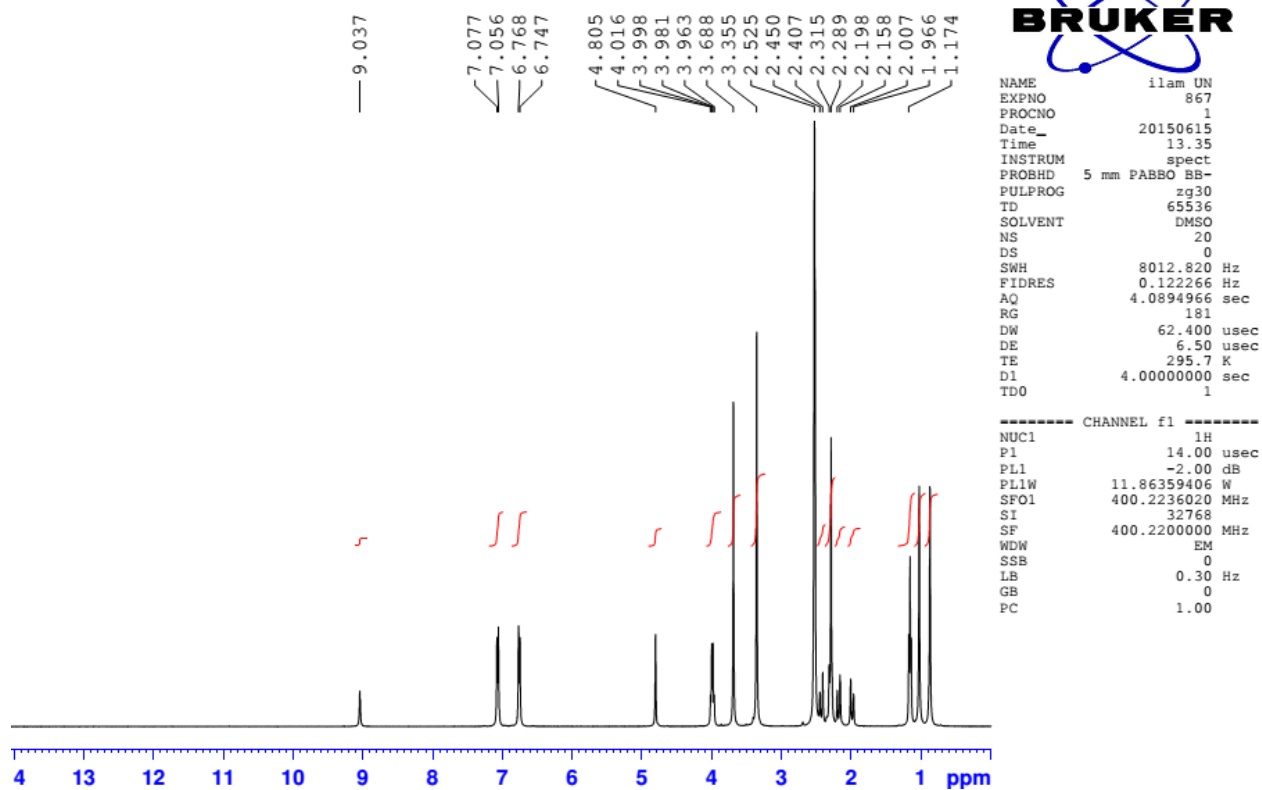

**IR of Ethyl-4-(3,4-dimethoxyphenyl)-2,7,7-trimethyl-5-oxo-1,4,5,6,7,8-hexahydroquinoline-3-carboxylate (entry 6, table 2)**

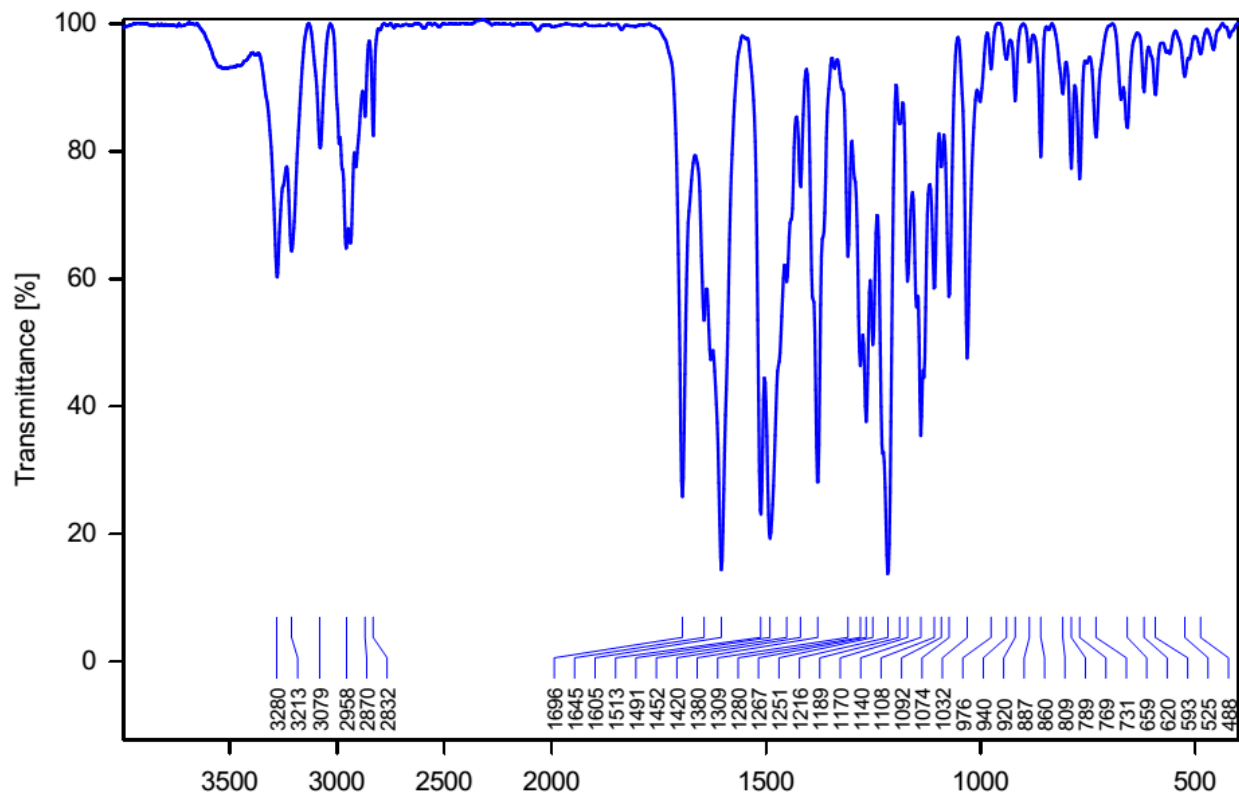

**<sup>1</sup>HNMR of Ethyl-4-(3,4-dimethoxyphenyl)-2,7,7-trimethyl-5-oxo-1,4,5,6,7,8-hexahydroquinoline-3-carboxylate (entry 6, table 2)**

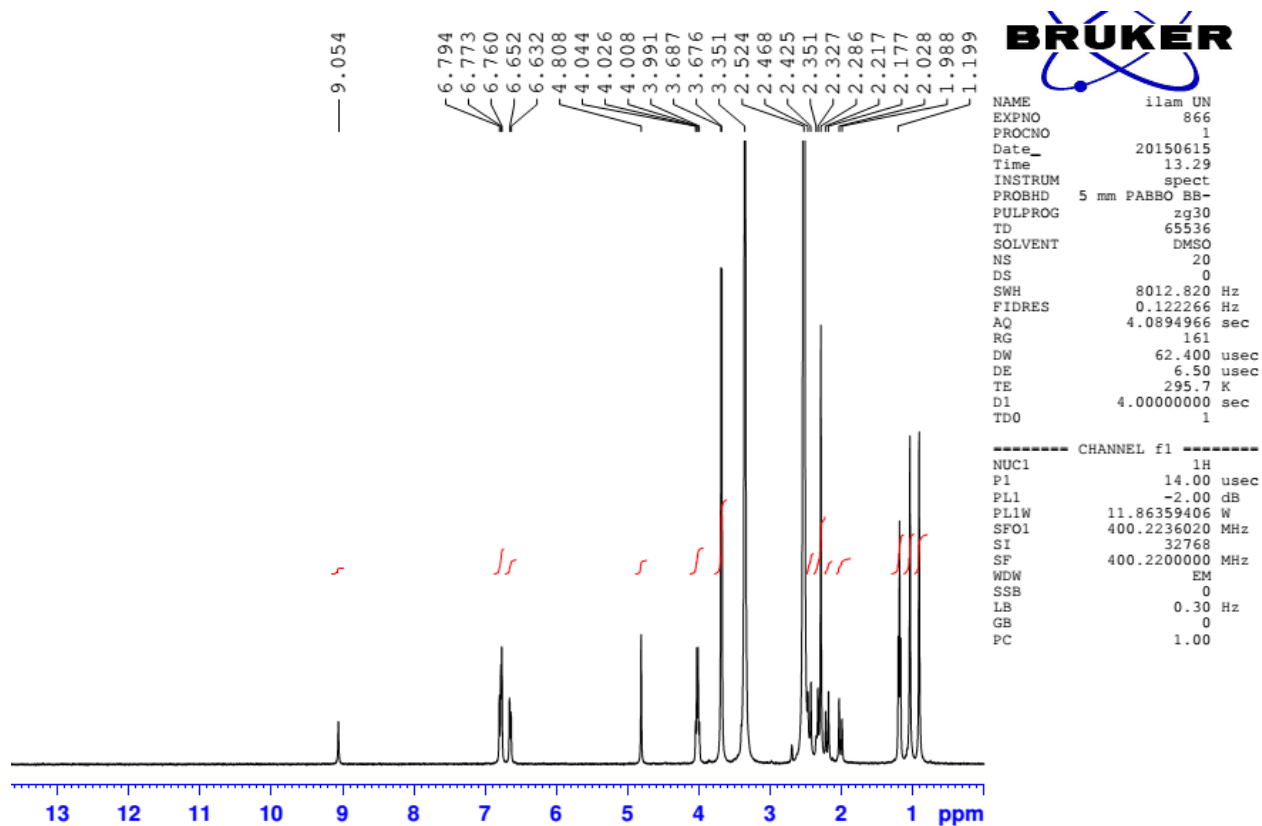

**IR of Ethyl-4-(4-bromophenyl)-2,7,7-trimethyl-5-oxo-1,4,5,6,7,8-hexahydroquinoline-3-carboxylate (entry 8, table 2)**

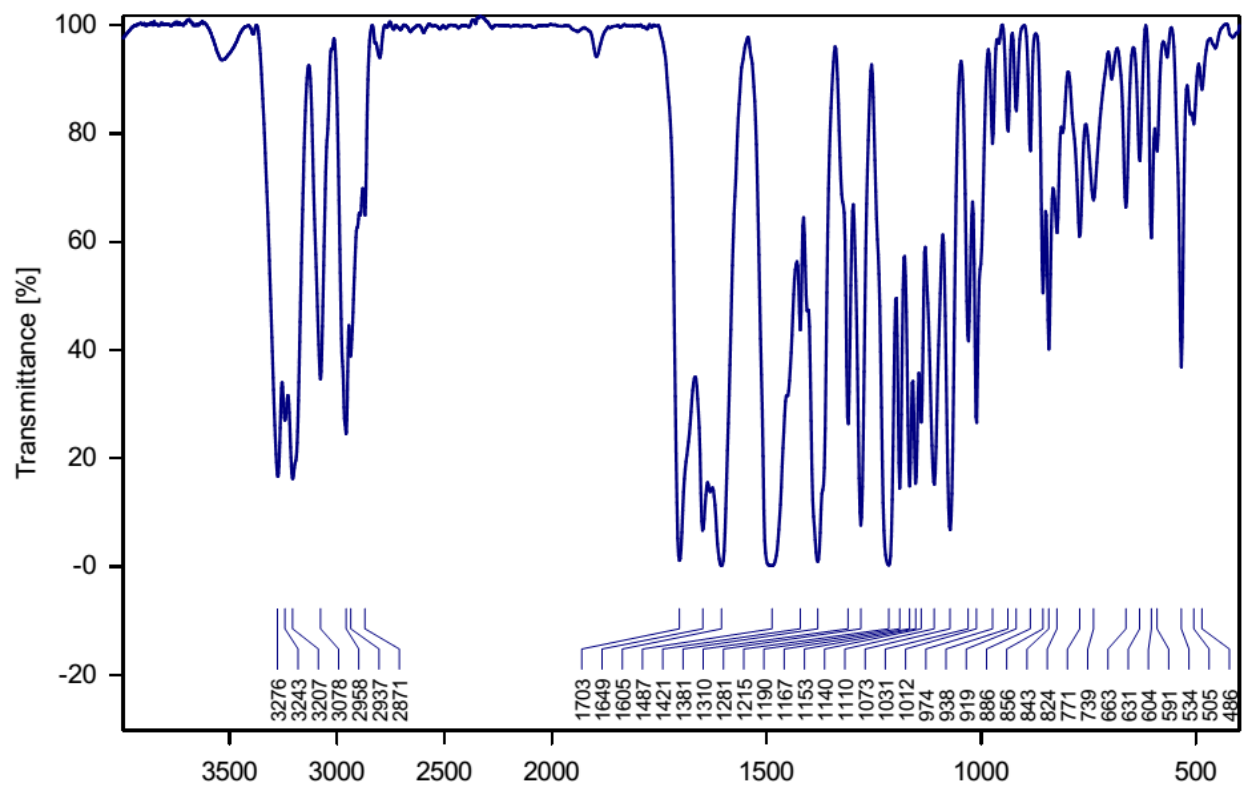

**<sup>1</sup>HNMR of Ethyl-4-(4-bromophenyl)-2,7,7-trimethyl-5-oxo-1,4,5,6,7,8-hexahydroquinoline-3-carboxylate (entry 8, table 2)**

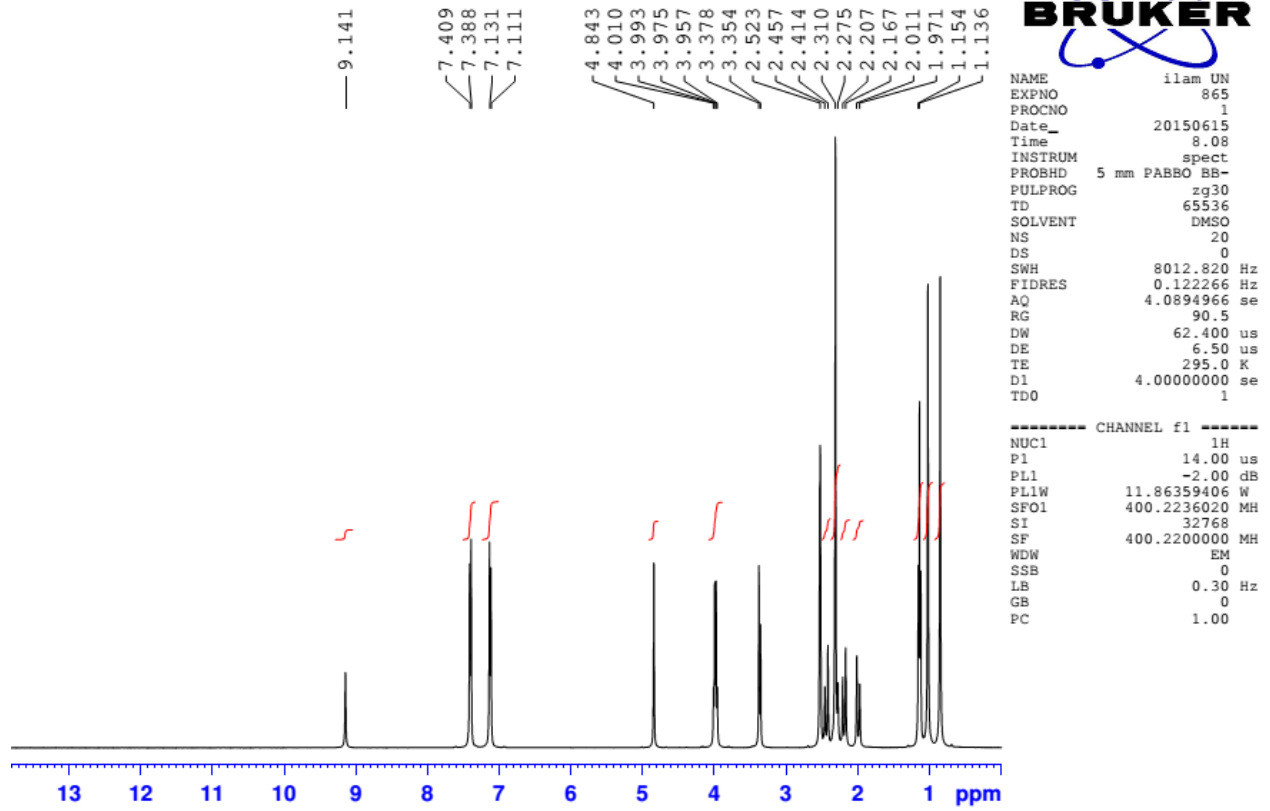

IR of 2-(4-methylphenyl)-2,3-dihydroquinazolin-4(1H)-one (entry 4, table 4)



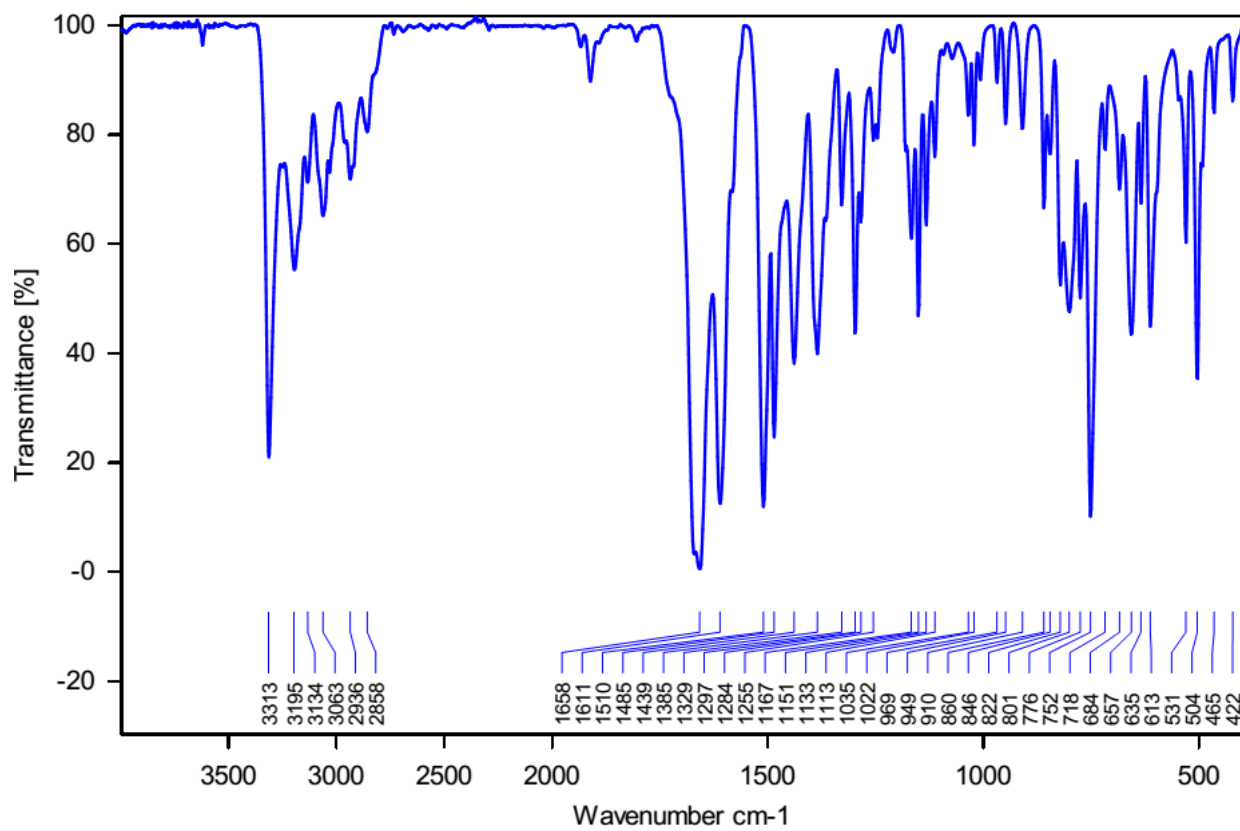

**<sup>1</sup>H NMR of 2-(4-methylphenyl)-2,3-dihydroquinazolin-4(1H)-one (entry 4, table 4)**

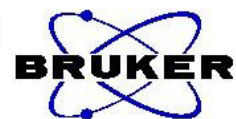

Current Data Parameters  
NAME 3H-1  
EXPNO 1188  
PROCNO 1

F2 - Acquisition Parameters  
Date\_ 20150614  
Time\_ 11.09  
INSTRUM spect  
PROBHD 5 mm Multinucl  
PULPROG zg  
TD 32768  
SOLVENT CDC13  
NS 16  
DS 0  
SWH 11574.074 Hz  
FIDRES 0.353213 Hz  
AQ 1.4156276 sec  
RG 645.1  
DM 43.200 usec  
DE 8.00 usec  
TE 300.0 K  
D1 5.00000000 sec

===== CHANNEL f1 =====  
NUC1 1H  
P1 9.00 usec  
PL1 -6.00 dB  
SF01 400.1324710 MHz

F2 - Processing parameters  
SI 32768  
SF 400.1300045 MHz  
WDW EM  
SSB 0  
LB 0.30 Hz  
GB 0  
PC 1.00

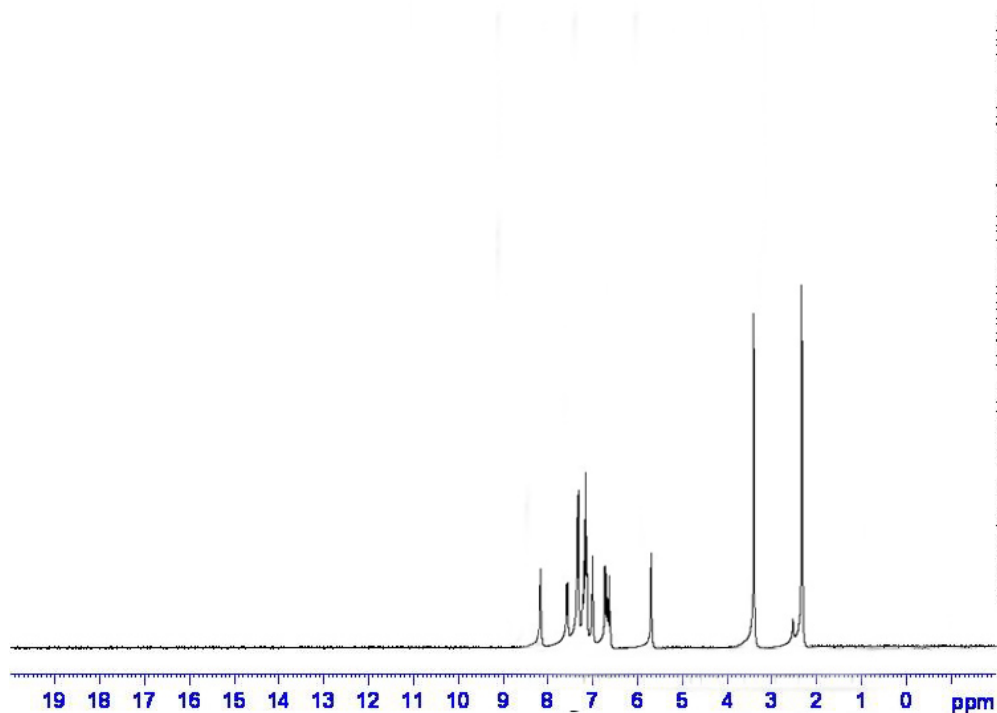

IR of 2-(4-ethoxyphenyl)-2,3-dihydroquinazolin-4(1H)-one (entry 5, table 4)

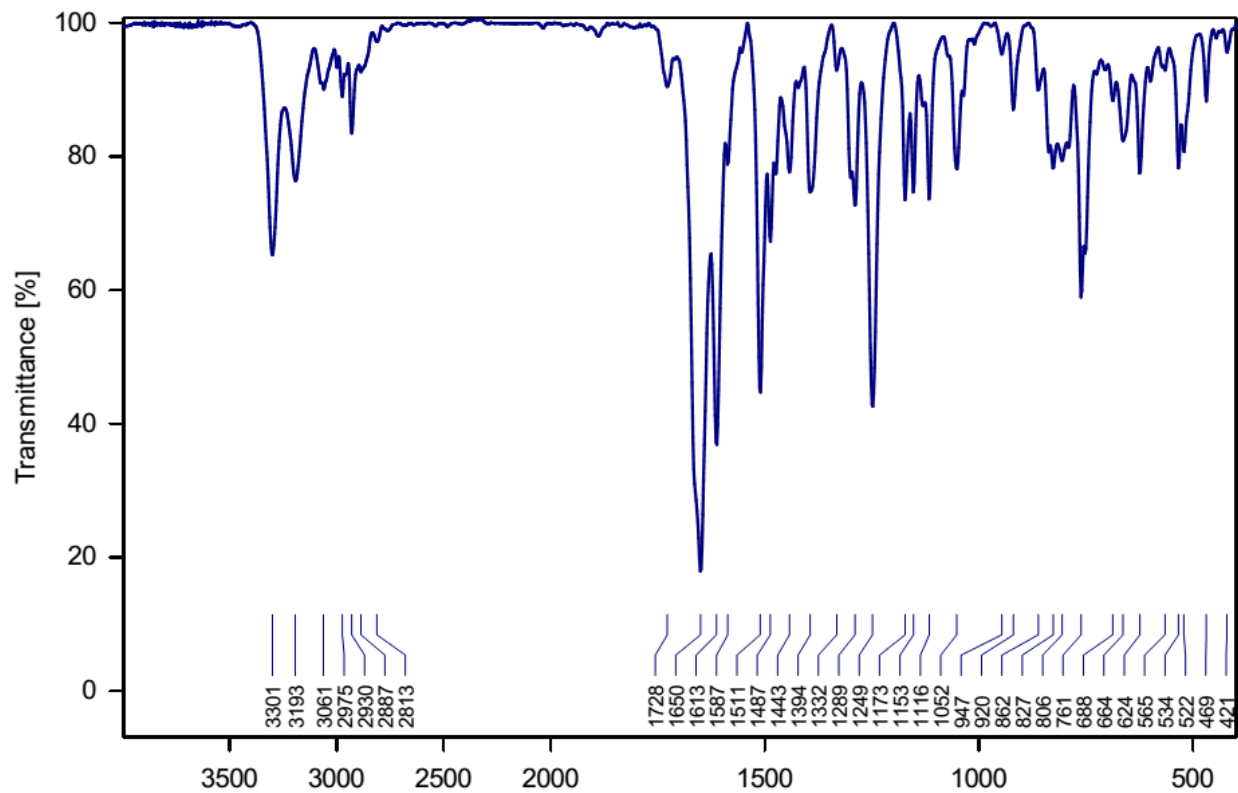

**<sup>1</sup>H NMR of 2-(4-ethoxyphenyl)-2,3-dihydroquinazolin-4(1H)-one (entry 5, table 4)**

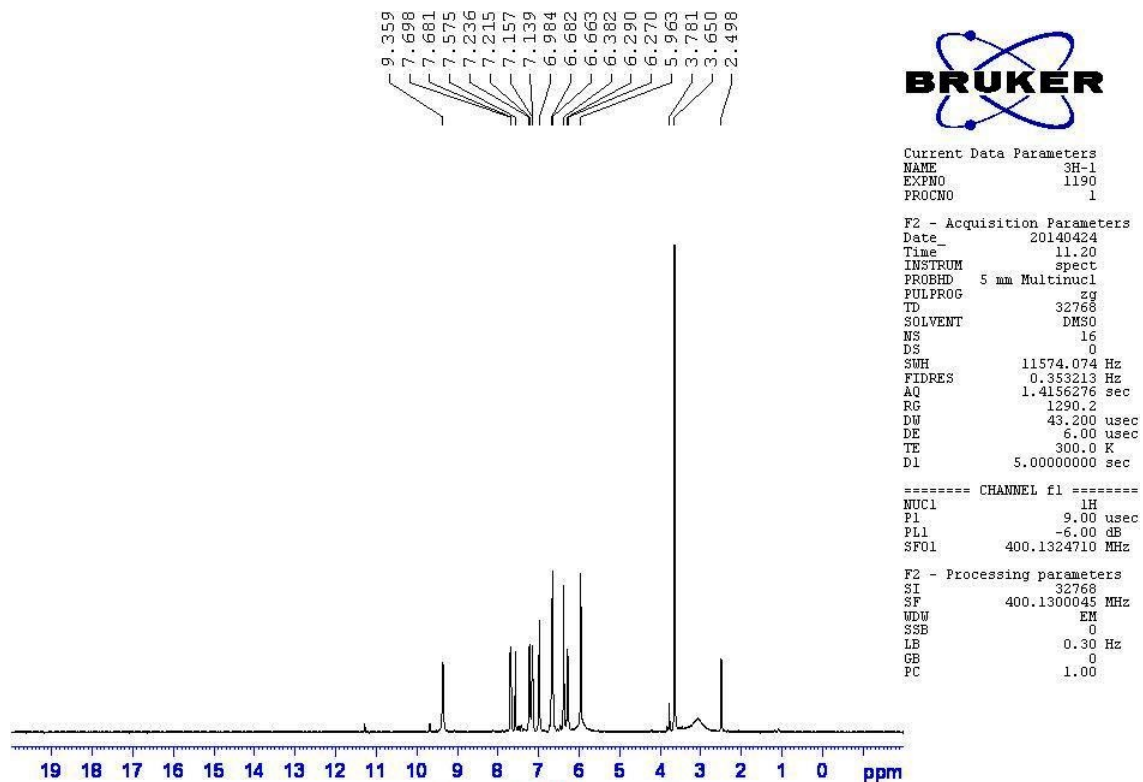

IR of 2-(3,4-dimethoxyphenyl)-2,3-dihydroquinazolin-4(1H)-one (entry 6, table 4)

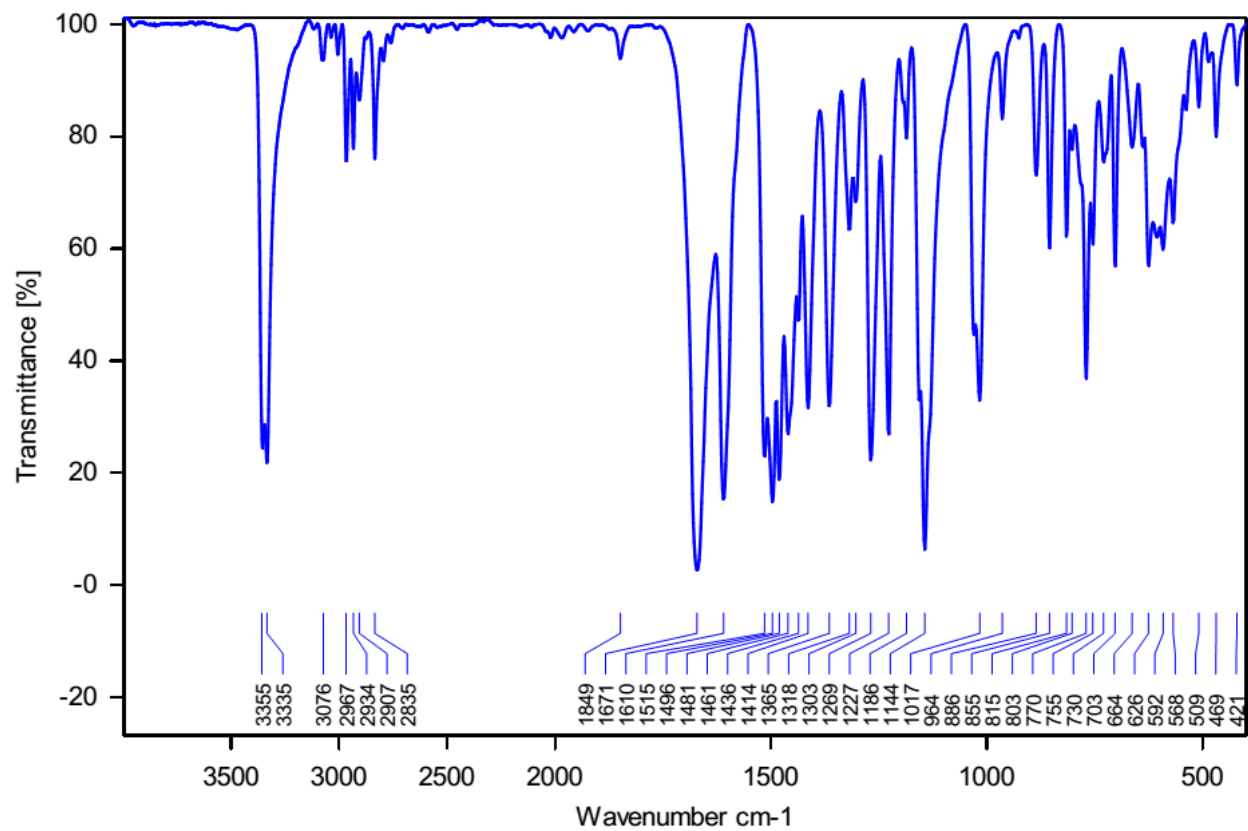

**<sup>1</sup>HNMR of 2-(3,4-dimethoxyphenyl)-2,3-dihydroquinazolin-4(1H)-one (entry 6, table 4)**

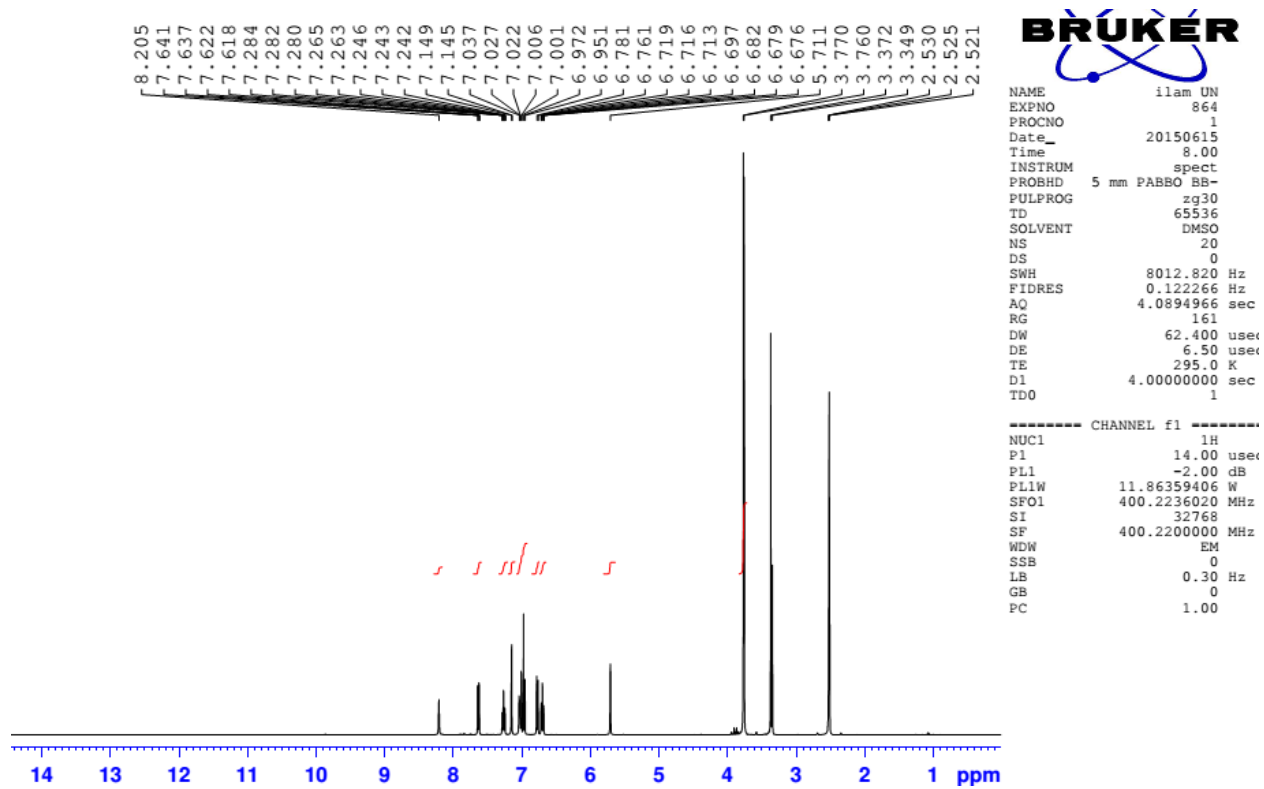

IR of 2-(4-bromophenyl)-2,3-dihydroquinazolin-4(1H)-one (entry 8, table 4)

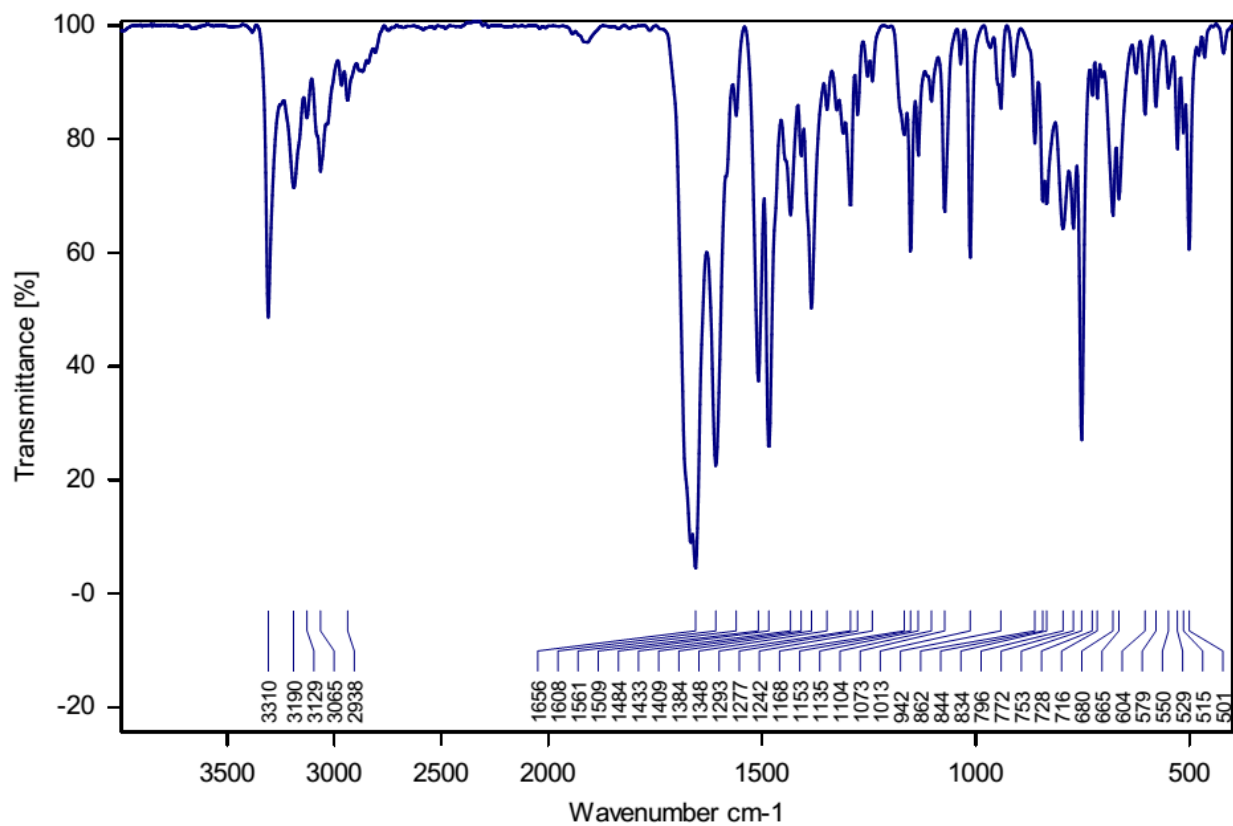

**1HNMR of 2-(4-bromophenyl)-2,3-dihydroquinazolin-4(1H)-one (entry 8, table 4)**

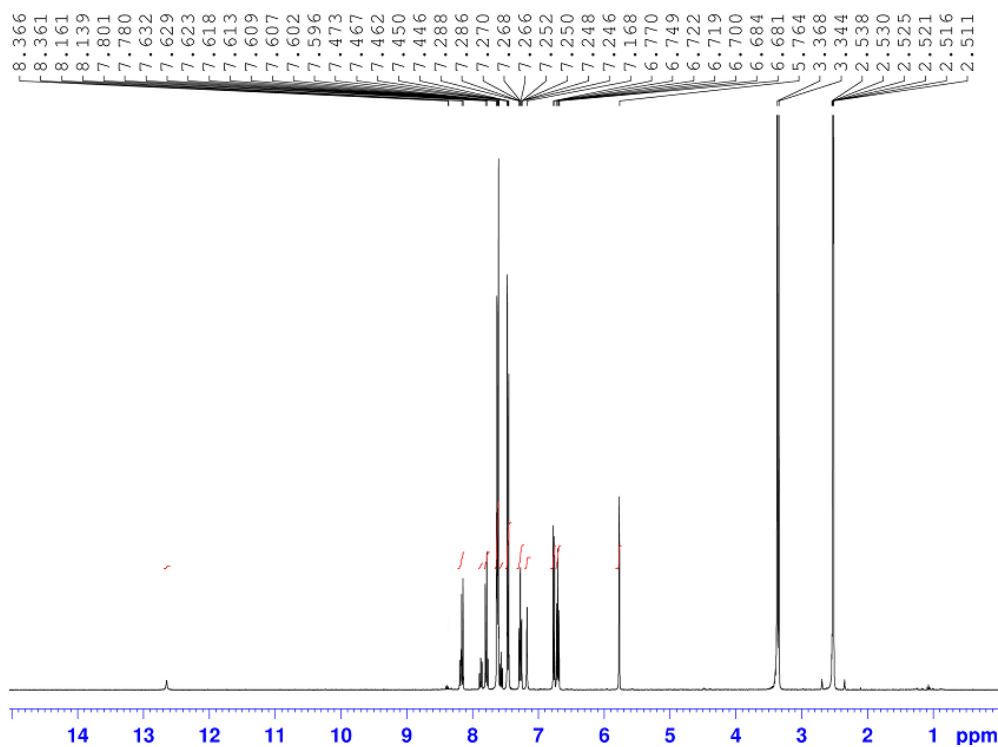

**BRUKER**

```

NAME      ilam UN
EXPNO     863
PROCNO    1
Date_     20150615
Time      7.55
INSTRUM   spect
PROBHD    5 mm PABBO BB-
PULPROG   zg30
TD         65536
SOLVENT   DMSO
NS         20
DS         0
SWH        8012.820 Hz
FIDRES     0.122266 Hz
AQ         4.0894966 sec
RG         228
DW         62.400 usec
DE         6.50 usec
TE         294.9 K
D1         4.0000000 sec
TD0        1

===== CHANNEL f1 =====
NUC1       1H
P1         14.00 usec
PL1        -2.00 dB
PL1W       11.86359406 W
SFO1       400.2236020 MHz
SI         32768
SF         400.2200000 MHz
NDW        EM
SSB        0
LB         0.30 Hz
GB         0
PC         1.00

```

**IR of 2-(4-chlorophenyl)-2,3-dihydroquinazolin-4(1H)-one (entry 9, table 4)**



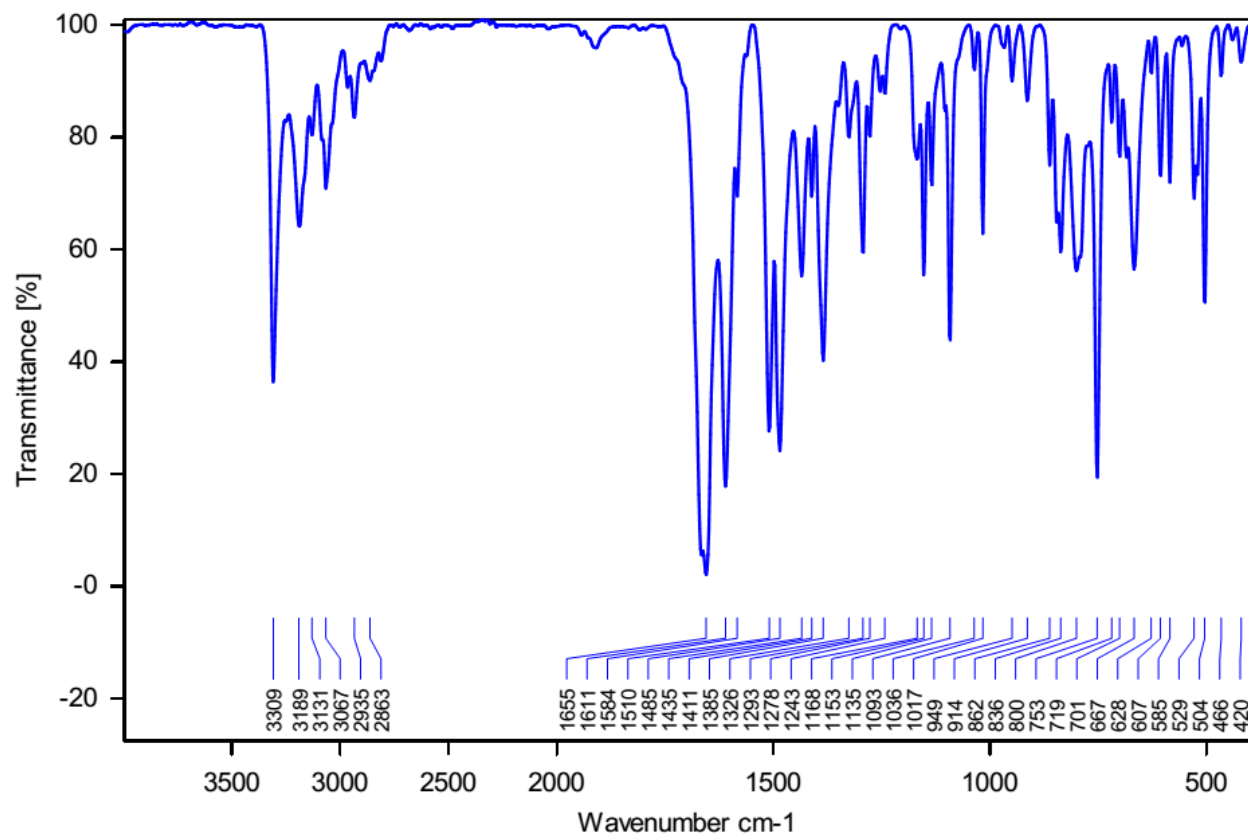

**<sup>1</sup>HNMR of 2-(4-chlorophenyl)-2,3-dihydroquinazolin-4(1H)-one (entry 9, table 4)**



Current Data Parameters  
NAME 3H-1  
EXPNO 1188  
PROCNO 1

F2 - Acquisition Parameters  
Date\_ 20150614  
Time\_ 11.09  
INSTRUM spect  
PROBHD 5 mm Multinucl  
PULPROG zg  
TD 32768  
SOLVENT CDC13  
NS 16  
DS 0  
SWH 11574.074 Hz  
FIDRES 0.353213 Hz  
AQ 1.4156276 sec  
RG 645.1  
DM 43.200 usec  
DE 8.00 usec  
TE 300.0 K  
D1 5.00000000 sec

===== CHANNEL f1 =====  
NUC1 1H  
P1 9.00 usec  
PL1 -6.00 dB  
SF01 400.1324710 MHz

F2 - Processing parameters  
SI 32768  
SF 400.1300045 MHz  
WDW EM  
SSB 0  
LB 0.30 Hz  
GB 0  
PC 1.00

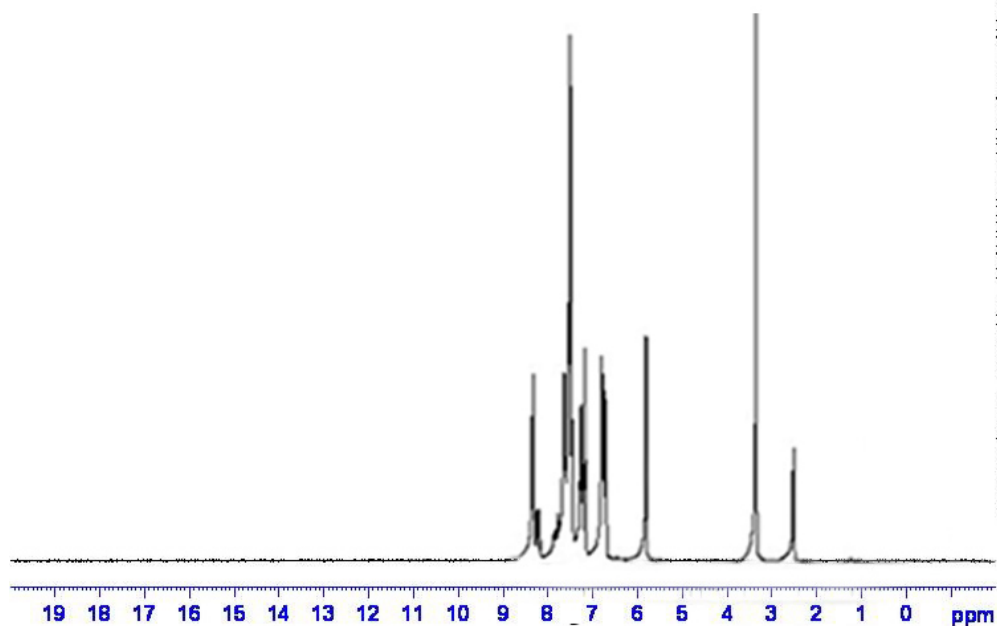

**IR of 2-(2-nitrophenyl)-2,3-dihydroquinazolin-4(1H)-one (entry 10, table 4)**

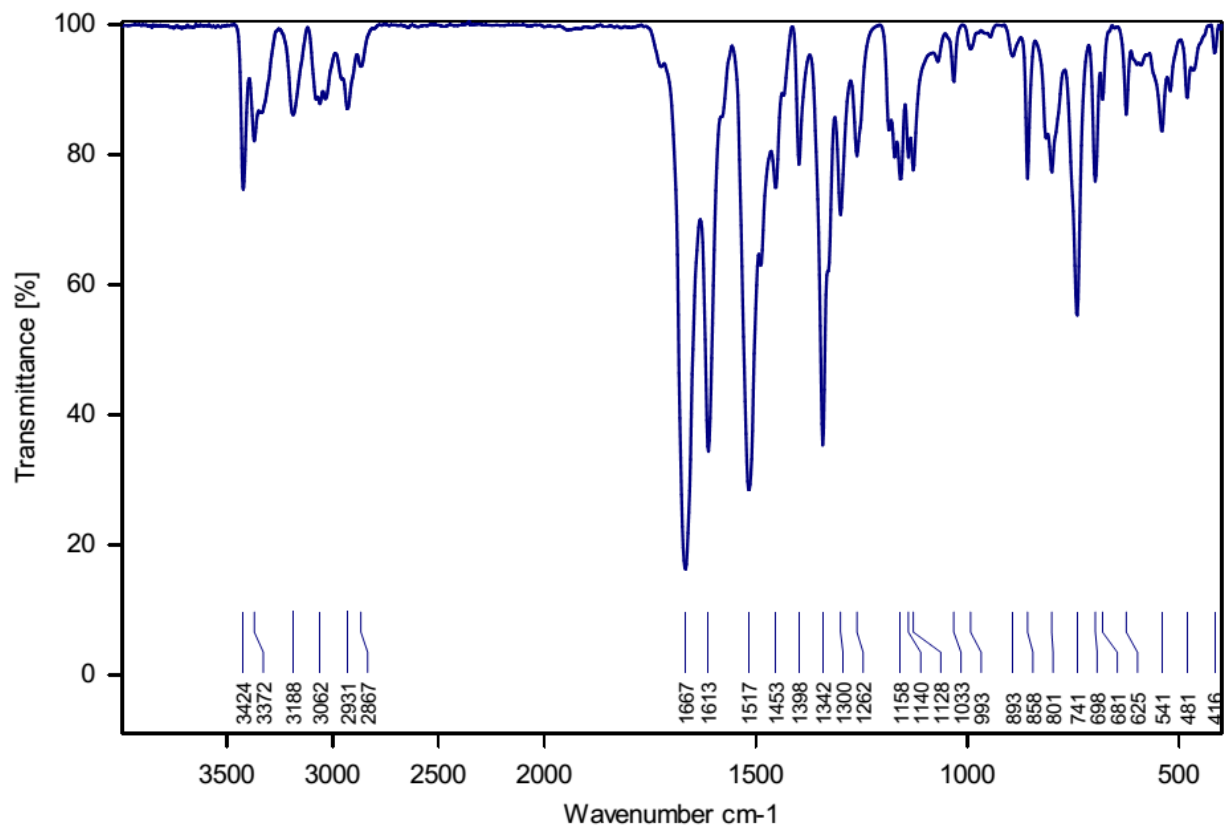

**<sup>1</sup>HNMR of 2-(2-nitrophenyl)-2,3-dihydroquinazolin-4(1H)-one (entry 10, table 4)**

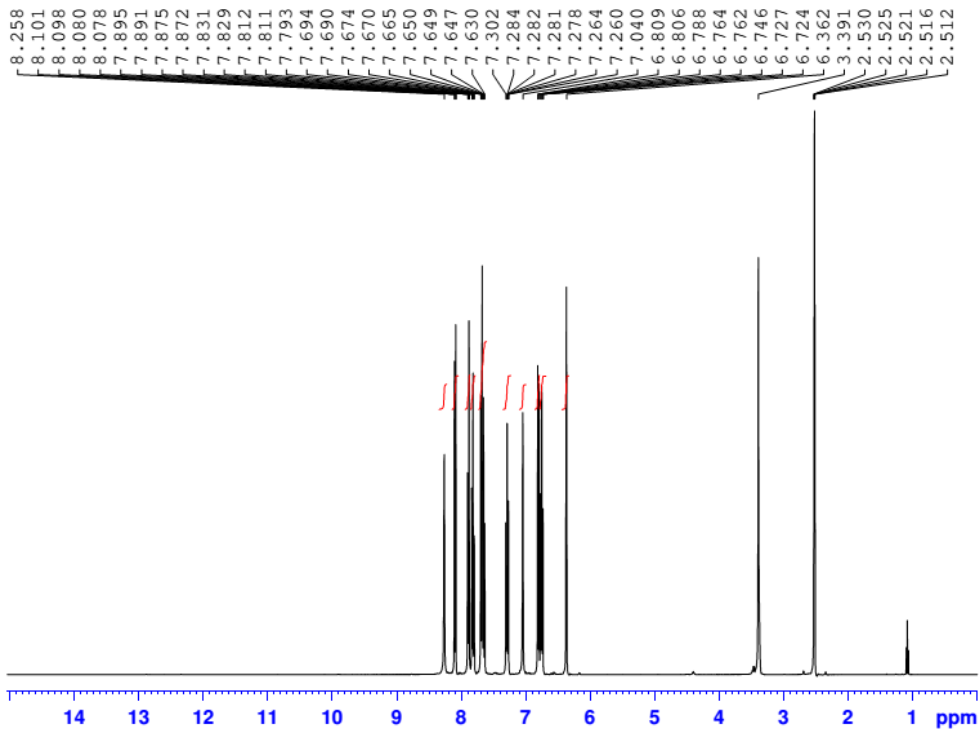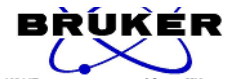

```

NAME          ilam UN
EXPNO         862
PROCNO        1
Date_         20150615
Time          7.50
INSTRUM       spect
PROBHD        5 mm PABBO BB-
PULPROG       zg30
TD            65536
SOLVENT       DMSO
NS            20
DS            0
SWH           8012.820 Hz
FIDRES        0.122266 Hz
AQ            4.0894966 sec
RG            128
DW            62.400 usec
DE            6.50 usec
TE            295.0 K
D1            4.00000000 sec
TDO           1

```

```

----- CHANNEL f1 -----
NUC1          1H
P1            14.00 usec
PL1           -2.00 dB
PL1W         11.86359406 W
SFO1         400.2236020 MHz
SI            32768
SF           400.2200000 MHz
WDW           EM
SSB           0
LB            0.30 Hz
GB            0
PC            1.00

```
